# Supplementary material for: Causal effect between telomere length and thirteen types of cancer in Asian population: a bidirectional mendelian randomization study
Source: Research Square preprint supplement (doi:10.21203/rs.3.rs-5053163/v1), 2025-04-01
Supplement: Supplementary file 2 [file 4e816989f81c75c1c4dada37.docx]

**Code used in this study**

**LTL on biliary tract cancer**

library(TwoSampleMR)

setwd("D:/R")

exp_dat <- read_exposure_data(

filename = "LTL.csv",

sep = ",",

snp_col = "SNP",

beta_col = "Beta_meta",

se_col = "SE_meta",

effect_allele_col = "Test allele",

other_allele_col = "Other allele",

pval_col = "P_meta",

samplesize_col = "N",)

exp_dat <- exp_dat[exp_dat$pval.exposure < 5e-8,]

exp_dat <- clump_data(

exp_dat,

clump_kb = 10000,

clump_r2 = 0.01,

clump_p1 = 1,

clump_p2 = 1,

pop = "EAS")

write.csv(exp_dat, file="exp_dat.csv")

out_dat <- read_outcome_data(

snps = exp_dat$SNP,

filename = "btca.csv",

sep = ",",

snp_col = "SNP",

beta_col = "BETA",

se_col = "SE",

effect_allele_col = "Allele2",

other_allele_col = "Allele1",

eaf_col = "AF_Allele2",

pval_col = "p.value",

samplesize_col = "N")

write.csv(exp_dat, file="out_dat.csv")

dat <- harmonise_data(

exposure_dat = exp_dat,

outcome_dat = out_dat)

write.csv(dat, file="dat.csv")

run_mr_presso(dat,NbDistribution = 1000)

mrpresso<-run_mr_presso(dat,NbDistribution = 1000)

write.csv(mrpresso, file = "mr_presso.csv", na = "NA")

res <- mr(dat)

res

generate_odds_ratios(res)

res5or<-generate_odds_ratios(res)

write.csv(res5or, file = "res5or.csv", na = "NA")

mr_heterogeneity(dat)

heterogeneity<-mr_heterogeneity(dat)

write.csv(heterogeneity, file = "heterogeneity.csv", na = "NA")

directionality_test(dat)

steiger<-directionality_test(dat)

write.csv(steiger, file = "steiger.csv", na = "NA")

mr_pleiotropy_test(dat)

pleiotropy<-mr_pleiotropy_test(dat)

write.csv(pleiotropy, file = "pleiotropy.csv", na = "NA")

res_single <- mr_singlesnp(dat)

res_single

write.csv(res_single, file = "res_single.csv", na = "NA")

res_loo <- mr_leaveoneout(dat)

res_loo

write.csv(res_loo, file = "res_loo.csv", na = "NA")

p1 <- mr_scatter_plot(res, dat)

p1[[1]]

library(ggplot2)

ggsave(p1[[1]], file="p1.pdf", width=7, height=7)

p2 <- mr_forest_plot(res_single)

p2[[1]]

ggsave(p2[[1]], file="p2.pdf", width=7, height=7)

p3 <- mr_leaveoneout_plot(res_loo)

p3[[1]]

ggsave(p3[[1]], file="p3.pdf", width=7, height=7)

res_single <- mr_singlesnp(dat)

p4 <- mr_funnel_plot(res_single)

p4[[1]]

ggsave(p4[[1]], file="p4.pdf", width=7, height=7)

**LTL on breast cancer**

library(TwoSampleMR)

setwd("D:/R")

exp_dat <- read_exposure_data(

filename = "LTL.csv",

sep = ",",

snp_col = "SNP",

beta_col = "Beta_meta",

se_col = "SE_meta",

effect_allele_col = "Test allele",

other_allele_col = "Other allele",

pval_col = "P_meta",

samplesize_col = "N",)

exp_dat <- exp_dat[exp_dat$pval.exposure < 5e-8,]

exp_dat <- clump_data(

exp_dat,

clump_kb = 10000,

clump_r2 = 0.01,

clump_p1 = 1,

clump_p2 = 1,

pop = "EAS")

write.csv(exp_dat, file="exp_dat.csv")

out_dat <- read_outcome_data(

snps = exp_dat$SNP,

filename = "brca.csv",

sep = ",",

snp_col = "SNP",

beta_col = "BETA",

se_col = "SE",

effect_allele_col = "Allele2",

other_allele_col = "Allele1",

eaf_col = "AF_Allele2",

pval_col = "p.value",

samplesize_col = "N")

write.csv(out_dat, file="out_dat.csv")

dat <- harmonise_data(

exposure_dat =exp_dat,

outcome_dat = out_dat)

write.csv(dat, file="dat.csv")

run_mr_presso(dat,NbDistribution = 1000)

ex<-c(1,4)

dat1<-dat[-ex,]

write.csv(dat1, file="dat1.csv")

run_mr_presso(dat1,NbDistribution = 1000)

mrpresso<-run_mr_presso(dat1,NbDistribution = 1000)

write.csv(mrpresso, file = "mr_presso.csv", na = "NA")

res <- mr(dat1)

res

generate_odds_ratios(res)

res5or<-generate_odds_ratios(res)

write.csv(res5or, file = "res5or.csv", na = "NA")

mr_heterogeneity(dat1)

heterogeneity<-mr_heterogeneity(dat1)

write.csv(heterogeneity, file = "heterogeneity.csv", na = "NA")

directionality_test(dat1)

steiger<-directionality_test(dat1)

write.csv(steiger, file = "steiger.csv", na = "NA")

mr_pleiotropy_test(dat1)

pleiotropy<-mr_pleiotropy_test(dat1)

write.csv(pleiotropy, file = "pleiotropy.csv", na = "NA")

res_single <- mr_singlesnp(dat1)

res_single

write.csv(res_single, file = "res_single.csv", na = "NA")

res_loo <- mr_leaveoneout(dat1)

res_loo

write.csv(res_loo, file = "res_loo.csv", na = "NA")

p1 <- mr_scatter_plot(res, dat1)

p1[[1]]

library(ggplot2)

ggsave(p1[[1]], file="p1.pdf", width=7, height=7)

p2 <- mr_forest_plot(res_single)

p2[[1]]

ggsave(p2[[1]], file="p2.pdf", width=7, height=7)

p3 <- mr_leaveoneout_plot(res_loo)

p3[[1]]

ggsave(p3[[1]], file="p3.pdf", width=7, height=7)

res_single <- mr_singlesnp(dat1)

p4 <- mr_funnel_plot(res_single)

p4[[1]]

ggsave(p4[[1]], file="p4.pdf", width=7, height=7)

**LTL on cervical cancer**

library(TwoSampleMR)

setwd("D:/R")

exp_dat <- read_exposure_data(

filename = "LTL.csv",

sep = ",",

snp_col = "SNP",

beta_col = "Beta_meta",

se_col = "SE_meta",

effect_allele_col = "Test allele",

other_allele_col = "Other allele",

pval_col = "P_meta",

samplesize_col = "N",)

exp_dat <- exp_dat[exp_dat$pval.exposure < 5e-8,]

exp_dat <- clump_data(

exp_dat,

clump_kb = 10000,

clump_r2 = 0.01,

clump_p1 = 1,

clump_p2 = 1,

pop = "EAS")

write.csv(exp_dat, file="exp_dat.csv")

out_dat <- read_outcome_data(

snps = exp_dat$SNP,

filename = "ceca.csv",

sep = ",",

snp_col = "SNP",

beta_col = "BETA",

se_col = "SE",

effect_allele_col = "Allele2",

other_allele_col = "Allele1",

eaf_col = "AF_Allele2",

pval_col = "p.value",

samplesize_col = "N")

write.csv(exp_dat, file="out_dat.csv")

dat <- harmonise_data(

exposure_dat = exp_dat,

outcome_dat = out_dat)

write.csv(dat, file="dat.csv")

run_mr_presso(dat,NbDistribution = 1000)

mrpresso<-run_mr_presso(dat,NbDistribution = 1000)

write.csv(mrpresso, file = "mr_presso.csv", na = "NA")

res <- mr(dat)

res

generate_odds_ratios(res)

res5or<-generate_odds_ratios(res)

write.csv(res5or, file = "res5or.csv", na = "NA")

mr_heterogeneity(dat)

heterogeneity<-mr_heterogeneity(dat)

write.csv(heterogeneity, file = "heterogeneity.csv", na = "NA")

directionality_test(dat)

steiger<-directionality_test(dat)

write.csv(steiger, file = "steiger.csv", na = "NA")

mr_pleiotropy_test(dat)

pleiotropy<-mr_pleiotropy_test(dat)

write.csv(pleiotropy, file = "pleiotropy.csv", na = "NA")

res_single <- mr_singlesnp(dat)

res_single

write.csv(res_single, file = "res_single.csv", na = "NA")

res_loo <- mr_leaveoneout(dat)

res_loo

write.csv(res_loo, file = "res_loo.csv", na = "NA")

p1 <- mr_scatter_plot(res, dat)

p1[[1]]

library(ggplot2)

ggsave(p1[[1]], file="p1.pdf", width=7, height=7)

p2 <- mr_forest_plot(res_single)

p2[[1]]

ggsave(p2[[1]], file="p2.pdf", width=7, height=7)

p3 <- mr_leaveoneout_plot(res_loo)

p3[[1]]

ggsave(p3[[1]], file="p3.pdf", width=7, height=7)

res_single <- mr_singlesnp(dat)

p4 <- mr_funnel_plot(res_single)

p4[[1]]

ggsave(p4[[1]], file="p4.pdf", width=7, height=7)

**LTL on colorectal cancer**

library(TwoSampleMR)

setwd("D:/R")

exp_dat <- read_exposure_data(

filename = "LTL.csv",

sep = ",",

snp_col = "SNP",

beta_col = "Beta_meta",

se_col = "SE_meta",

effect_allele_col = "Test allele",

other_allele_col = "Other allele",

pval_col = "P_meta",

samplesize_col = "N",)

exp_dat <- exp_dat[exp_dat$pval.exposure < 5e-8,]

exp_dat <- clump_data(

exp_dat,

clump_kb = 10000,

clump_r2 = 0.01,

clump_p1 = 1,

clump_p2 = 1,

pop = "EAS")

write.csv(exp_dat, file="exp_dat.csv")

out_dat <- read_outcome_data(

snps = exp_dat$SNP,

filename = "coca.csv",

sep = ",",

snp_col = "SNP",

beta_col = "BETA",

se_col = "SE",

effect_allele_col = "Allele2",

other_allele_col = "Allele1",

eaf_col = "AF_Allele2",

pval_col = "p.value",

samplesize_col = "N")

write.csv(exp_dat, file="out_dat.csv")

dat <- harmonise_data(

exposure_dat = exp_dat,

outcome_dat = out_dat)

write.csv(dat, file="dat.csv")

run_mr_presso(dat,NbDistribution = 1000)

mrpresso<-run_mr_presso(dat,NbDistribution = 1000)

write.csv(mrpresso, file = "mr_presso.csv", na = "NA")

res <- mr(dat)

res

generate_odds_ratios(res)

res5or<-generate_odds_ratios(res)

write.csv(res5or, file = "res5or.csv", na = "NA")

mr_heterogeneity(dat)

heterogeneity<-mr_heterogeneity(dat)

write.csv(heterogeneity, file = "heterogeneity.csv", na = "NA")

directionality_test(dat)

steiger<-directionality_test(dat)

write.csv(steiger, file = "steiger.csv", na = "NA")

mr_pleiotropy_test(dat)

pleiotropy<-mr_pleiotropy_test(dat)

write.csv(pleiotropy, file = "pleiotropy.csv", na = "NA")

res_single <- mr_singlesnp(dat)

res_single

write.csv(res_single, file = "res_single.csv", na = "NA")

res_loo <- mr_leaveoneout(dat)

res_loo

write.csv(res_loo, file = "res_loo.csv", na = "NA")

p1 <- mr_scatter_plot(res, dat)

p1[[1]]

library(ggplot2)

ggsave(p1[[1]], file="p1.pdf", width=7, height=7)

p2 <- mr_forest_plot(res_single)

p2[[1]]

ggsave(p2[[1]], file="p2.pdf", width=7, height=7)

p3 <- mr_leaveoneout_plot(res_loo)

p3[[1]]

ggsave(p3[[1]], file="p3.pdf", width=7, height=7)

res_single <- mr_singlesnp(dat)

p4 <- mr_funnel_plot(res_single)

p4[[1]]

ggsave(p4[[1]], file="p4.pdf", width=7, height=7)

**LTL on endometrial cancer**

library(TwoSampleMR)

setwd("D:/R")

exp_dat <- read_exposure_data(

filename = "LTL.csv",

sep = ",",

snp_col = "SNP",

beta_col = "Beta_meta",

se_col = "SE_meta",

effect_allele_col = "Test allele",

other_allele_col = "Other allele",

pval_col = "P_meta",

samplesize_col = "N",)

exp_dat <- exp_dat[exp_dat$pval.exposure < 5e-8,]

exp_dat <- clump_data(

exp_dat,

clump_kb = 10000,

clump_r2 = 0.01,

clump_p1 = 1,

clump_p2 = 1,

pop = "EAS")

write.csv(exp_dat, file="exp_dat.csv")

out_dat <- read_outcome_data(

snps = exp_dat$SNP,

filename = "enca.csv",

sep = ",",

snp_col = "SNP",

beta_col = "BETA",

se_col = "SE",

effect_allele_col = "Allele2",

other_allele_col = "Allele1",

eaf_col = "AF_Allele2",

pval_col = "p.value",

samplesize_col = "N")

write.csv(exp_dat, file="out_dat.csv")

dat <- harmonise_data(

exposure_dat = exp_dat,

outcome_dat = out_dat)

write.csv(dat, file="dat.csv")

run_mr_presso(dat,NbDistribution = 1000)

mrpresso<-run_mr_presso(dat,NbDistribution = 1000)

write.csv(mrpresso, file = "mr_presso.csv", na = "NA")

res <- mr(dat)

res

generate_odds_ratios(res)

res5or<-generate_odds_ratios(res)

write.csv(res5or, file = "res5or.csv", na = "NA")

mr_heterogeneity(dat)

heterogeneity<-mr_heterogeneity(dat)

write.csv(heterogeneity, file = "heterogeneity.csv", na = "NA")

directionality_test(dat)

steiger<-directionality_test(dat)

write.csv(steiger, file = "steiger.csv", na = "NA")

mr_pleiotropy_test(dat)

pleiotropy<-mr_pleiotropy_test(dat)

write.csv(pleiotropy, file = "pleiotropy.csv", na = "NA")

res_single <- mr_singlesnp(dat)

res_single

write.csv(res_single, file = "res_single.csv", na = "NA")

res_loo <- mr_leaveoneout(dat)

res_loo

write.csv(res_loo, file = "res_loo.csv", na = "NA")

p1 <- mr_scatter_plot(res, dat)

p1[[1]]

library(ggplot2)

ggsave(p1[[1]], file="p1.pdf", width=7, height=7)

p2 <- mr_forest_plot(res_single)

p2[[1]]

ggsave(p2[[1]], file="p2.pdf", width=7, height=7)

p3 <- mr_leaveoneout_plot(res_loo)

p3[[1]]

ggsave(p3[[1]], file="p3.pdf", width=7, height=7)

res_single <- mr_singlesnp(dat)

p4 <- mr_funnel_plot(res_single)

p4[[1]]

ggsave(p4[[1]], file="p4.pdf", width=7, height=7)

**LTL on esophageal cancer**

library(TwoSampleMR)

setwd("D:/R")

exp_dat <- read_exposure_data(

filename = "LTL.csv",

sep = ",",

snp_col = "SNP",

beta_col = "Beta_meta",

se_col = "SE_meta",

effect_allele_col = "Test allele",

other_allele_col = "Other allele",

pval_col = "P_meta",

samplesize_col = "N",)

exp_dat <- exp_dat[exp_dat$pval.exposure < 5e-8,]

exp_dat <- clump_data(

exp_dat,

clump_kb = 10000,

clump_r2 = 0.01,

clump_p1 = 1,

clump_p2 = 1,

pop = "EAS")

write.csv(exp_dat, file="exp_dat.csv")

out_dat <- read_outcome_data(

snps = exp_dat$SNP,

filename = "esca.csv",

sep = ",",

snp_col = "SNP",

beta_col = "BETA",

se_col = "SE",

effect_allele_col = "Allele2",

other_allele_col = "Allele1",

eaf_col = "AF_Allele2",

pval_col = "p.value",

samplesize_col = "N")

write.csv(exp_dat, file="out_dat.csv")

dat <- harmonise_data(

exposure_dat = exp_dat,

outcome_dat = out_dat)

write.csv(dat, file="dat.csv")

run_mr_presso(dat,NbDistribution = 1000)

mrpresso<-run_mr_presso(dat,NbDistribution = 1000)

write.csv(mrpresso, file = "mr_presso.csv", na = "NA")

res <- mr(dat)

res

generate_odds_ratios(res)

res5or<-generate_odds_ratios(res)

write.csv(res5or, file = "res5or.csv", na = "NA")

mr_heterogeneity(dat)

heterogeneity<-mr_heterogeneity(dat)

write.csv(heterogeneity, file = "heterogeneity.csv", na = "NA")

directionality_test(dat)

steiger<-directionality_test(dat)

write.csv(steiger, file = "steiger.csv", na = "NA")

mr_pleiotropy_test(dat)

pleiotropy<-mr_pleiotropy_test(dat)

write.csv(pleiotropy, file = "pleiotropy.csv", na = "NA")

res_single <- mr_singlesnp(dat)

res_single

write.csv(res_single, file = "res_single.csv", na = "NA")

res_loo <- mr_leaveoneout(dat)

res_loo

write.csv(res_loo, file = "res_loo.csv", na = "NA")

p1 <- mr_scatter_plot(res, dat)

p1[[1]]

library(ggplot2)

ggsave(p1[[1]], file="p1.pdf", width=7, height=7)

p2 <- mr_forest_plot(res_single)

p2[[1]]

ggsave(p2[[1]], file="p2.pdf", width=7, height=7)

p3 <- mr_leaveoneout_plot(res_loo)

p3[[1]]

ggsave(p3[[1]], file="p3.pdf", width=7, height=7)

res_single <- mr_singlesnp(dat)

p4 <- mr_funnel_plot(res_single)

p4[[1]]

ggsave(p4[[1]], file="p4.pdf", width=7, height=7)

**LTL on gastric cancer**

library(TwoSampleMR)

setwd("D:/R")

exp_dat <- read_exposure_data(

filename = "LTL.csv",

sep = ",",

snp_col = "SNP",

beta_col = "Beta_meta",

se_col = "SE_meta",

effect_allele_col = "Test allele",

other_allele_col = "Other allele",

pval_col = "P_meta",

samplesize_col = "N",)

exp_dat <- exp_dat[exp_dat$pval.exposure < 5e-8,]

exp_dat <- clump_data(

exp_dat,

clump_kb = 10000,

clump_r2 = 0.01,

clump_p1 = 1,

clump_p2 = 1,

pop = "EAS")

write.csv(exp_dat, file="exp_dat.csv")

out_dat <- read_outcome_data(

snps = exp_dat$SNP,

filename = "gaca.csv",

sep = ",",

snp_col = "SNP",

beta_col = "BETA",

se_col = "SE",

effect_allele_col = "Allele2",

other_allele_col = "Allele1",

eaf_col = "AF_Allele2",

pval_col = "p.value",

samplesize_col = "N")

write.csv(exp_dat, file="out_dat.csv")

dat <- harmonise_data(

exposure_dat = exp_dat,

outcome_dat = out_dat)

write.csv(dat, file="dat.csv")

run_mr_presso(dat,NbDistribution = 1000)

ex<-c(6)

dat1<-dat[-ex,]

write.csv(dat1, file="dat1.csv")

run_mr_presso(dat1,NbDistribution = 1000)

mrpresso<-run_mr_presso(dat1,NbDistribution = 1000)

write.csv(mrpresso, file = "mr_presso.csv", na = "NA")

res <- mr(dat1)

res

generate_odds_ratios(res)

res5or<-generate_odds_ratios(res)

write.csv(res5or, file = "res5or.csv", na = "NA")

mr_heterogeneity(dat1)

heterogeneity<-mr_heterogeneity(dat1)

write.csv(heterogeneity, file = "heterogeneity.csv", na = "NA")

directionality_test(dat1)

steiger<-directionality_test(dat1)

write.csv(steiger, file = "steiger.csv", na = "NA")

mr_pleiotropy_test(dat1)

pleiotropy<-mr_pleiotropy_test(dat1)

write.csv(pleiotropy, file = "pleiotropy.csv", na = "NA")

res_single <- mr_singlesnp(dat1)

res_single

write.csv(res_single, file = "res_single.csv", na = "NA")

res_loo <- mr_leaveoneout(dat1)

res_loo

write.csv(res_loo, file = "res_loo.csv", na = "NA")

p1 <- mr_scatter_plot(res, dat1)

p1[[1]]

library(ggplot2)

ggsave(p1[[1]], file="p1.pdf", width=7, height=7)

p2 <- mr_forest_plot(res_single)

p2[[1]]

ggsave(p2[[1]], file="p2.pdf", width=7, height=7)

p3 <- mr_leaveoneout_plot(res_loo)

p3[[1]]

ggsave(p3[[1]], file="p3.pdf", width=7, height=7)

res_single <- mr_singlesnp(dat1)

p4 <- mr_funnel_plot(res_single)

p4[[1]]

ggsave(p4[[1]], file="p4.pdf", width=7, height=7)

**LTL on hematological malignancy**

library(TwoSampleMR)

setwd("D:/R")

exp_dat <- read_exposure_data(

filename = "LTL.csv",

sep = ",",

snp_col = "SNP",

beta_col = "Beta_meta",

se_col = "SE_meta",

effect_allele_col = "Test allele",

other_allele_col = "Other allele",

pval_col = "P_meta",

samplesize_col = "N",)

exp_dat <- exp_dat[exp_dat$pval.exposure < 5e-8,]

exp_dat <- clump_data(

exp_dat,

clump_kb = 10000,

clump_r2 = 0.01,

clump_p1 = 1,

clump_p2 = 1,

pop = "EAS")

write.csv(exp_dat, file="exp_dat.csv")

out_dat <- read_outcome_data(

snps = exp_dat$SNP,

filename = "hemma.csv",

sep = ",",

snp_col = "SNP",

beta_col = "BETA",

se_col = "SE",

effect_allele_col = "Allele2",

other_allele_col = "Allele1",

eaf_col = "AF_Allele2",

pval_col = "p.value",

samplesize_col = "N")

write.csv(exp_dat, file="out_dat.csv")

dat <- harmonise_data(

exposure_dat = exp_dat,

outcome_dat = out_dat)

write.csv(dat, file="dat.csv")

run_mr_presso(dat,NbDistribution = 1000)

mrpresso<-run_mr_presso(dat,NbDistribution = 1000)

write.csv(mrpresso, file = "mr_presso.csv", na = "NA")

res <- mr(dat)

res

generate_odds_ratios(res)

res5or<-generate_odds_ratios(res)

write.csv(res5or, file = "res5or.csv", na = "NA")

mr_heterogeneity(dat)

heterogeneity<-mr_heterogeneity(dat)

write.csv(heterogeneity, file = "heterogeneity.csv", na = "NA")

directionality_test(dat)

steiger<-directionality_test(dat)

write.csv(steiger, file = "steiger.csv", na = "NA")

mr_pleiotropy_test(dat)

pleiotropy<-mr_pleiotropy_test(dat)

write.csv(pleiotropy, file = "pleiotropy.csv", na = "NA")

res_single <- mr_singlesnp(dat)

res_single

write.csv(res_single, file = "res_single.csv", na = "NA")

res_loo <- mr_leaveoneout(dat)

res_loo

write.csv(res_loo, file = "res_loo.csv", na = "NA")

p1 <- mr_scatter_plot(res, dat)

p1[[1]]

library(ggplot2)

ggsave(p1[[1]], file="p1.pdf", width=7, height=7)

p2 <- mr_forest_plot(res_single)

p2[[1]]

ggsave(p2[[1]], file="p2.pdf", width=7, height=7)

p3 <- mr_leaveoneout_plot(res_loo)

p3[[1]]

ggsave(p3[[1]], file="p3.pdf", width=7, height=7)

res_single <- mr_singlesnp(dat)

p4 <- mr_funnel_plot(res_single)

p4[[1]]

ggsave(p4[[1]], file="p4.pdf", width=7, height=7)

**LTL on hepatocellular carcinoma**

library(TwoSampleMR)

setwd("D:/R")

exp_dat <- read_exposure_data(

filename = "LTL.csv",

sep = ",",

snp_col = "SNP",

beta_col = "Beta_meta",

se_col = "SE_meta",

effect_allele_col = "Test allele",

other_allele_col = "Other allele",

pval_col = "P_meta",

samplesize_col = "N",)

exp_dat <- exp_dat[exp_dat$pval.exposure < 5e-8,]

exp_dat <- clump_data(

exp_dat,

clump_kb = 10000,

clump_r2 = 0.01,

clump_p1 = 1,

clump_p2 = 1,

pop = "EAS")

write.csv(exp_dat, file="exp_dat.csv")

out_dat <- read_outcome_data(

snps = exp_dat$SNP,

filename = "hcc.csv",

sep = ",",

snp_col = "SNP",

beta_col = "BETA",

se_col = "SE",

effect_allele_col = "Allele2",

other_allele_col = "Allele1",

eaf_col = "AF_Allele2",

pval_col = "p.value",

samplesize_col = "N")

write.csv(exp_dat, file="out_dat.csv")

dat <- harmonise_data(

exposure_dat = exp_dat,

outcome_dat = out_dat)

write.csv(dat, file="dat.csv")

run_mr_presso(dat,NbDistribution = 1000)

mrpresso<-run_mr_presso(dat,NbDistribution = 1000)

write.csv(mrpresso, file = "mr_presso.csv", na = "NA")

res <- mr(dat)

res

generate_odds_ratios(res)

res5or<-generate_odds_ratios(res)

write.csv(res5or, file = "res5or.csv", na = "NA")

mr_heterogeneity(dat)

heterogeneity<-mr_heterogeneity(dat)

write.csv(heterogeneity, file = "heterogeneity.csv", na = "NA")

directionality_test(dat)

steiger<-directionality_test(dat)

write.csv(steiger, file = "steiger.csv", na = "NA")

mr_pleiotropy_test(dat)

pleiotropy<-mr_pleiotropy_test(dat)

write.csv(pleiotropy, file = "pleiotropy.csv", na = "NA")

res_single <- mr_singlesnp(dat)

res_single

write.csv(res_single, file = "res_single.csv", na = "NA")

res_loo <- mr_leaveoneout(dat)

res_loo

write.csv(res_loo, file = "res_loo.csv", na = "NA")

p1 <- mr_scatter_plot(res, dat)

p1[[1]]

library(ggplot2)

ggsave(p1[[1]], file="p1.pdf", width=7, height=7)

p2 <- mr_forest_plot(res_single)

p2[[1]]

ggsave(p2[[1]], file="p2.pdf", width=7, height=7)

p3 <- mr_leaveoneout_plot(res_loo)

p3[[1]]

ggsave(p3[[1]], file="p3.pdf", width=7, height=7)

res_single <- mr_singlesnp(dat)

p4 <- mr_funnel_plot(res_single)

p4[[1]]

ggsave(p4[[1]], file="p4.pdf", width=7, height=7)

**LTL on lung cancer**

library(TwoSampleMR)

setwd("D:/R")

exp_dat <- read_exposure_data(

filename = "LTL.csv",

sep = ",",

snp_col = "SNP",

beta_col = "Beta_meta",

se_col = "SE_meta",

effect_allele_col = "Test allele",

other_allele_col = "Other allele",

pval_col = "P_meta",

samplesize_col = "N",)

exp_dat <- exp_dat[exp_dat$pval.exposure < 5e-8,]

exp_dat <- clump_data(

exp_dat,

clump_kb = 10000,

clump_r2 = 0.01,

clump_p1 = 1,

clump_p2 = 1,

pop = "EAS")

write.csv(exp_dat, file="exp_dat.csv")

out_dat <- read_outcome_data(

snps = exp_dat$SNP,

filename = "luca.csv",

sep = ",",

snp_col = "SNP",

beta_col = "BETA",

se_col = "SE",

effect_allele_col = "Allele2",

other_allele_col = "Allele1",

eaf_col = "AF_Allele2",

pval_col = "p.value",

samplesize_col = "N")

write.csv(exp_dat, file="out_dat.csv")

dat <- harmonise_data(

exposure_dat = exp_dat,

outcome_dat = out_dat)

write.csv(dat, file="dat.csv")

run_mr_presso(dat,NbDistribution = 1000)

ex<-c(8)

dat1<-dat[-ex,]

write.csv(dat1, file="dat1.csv")

run_mr_presso(dat1,NbDistribution = 1000)

mrpresso<-run_mr_presso(dat1,NbDistribution = 1000)

write.csv(mrpresso, file = "mr_presso.csv", na = "NA")

res <- mr(dat1)

res

generate_odds_ratios(res)

res5or<-generate_odds_ratios(res)

write.csv(res5or, file = "res5or.csv", na = "NA")

mr_heterogeneity(dat1)

heterogeneity<-mr_heterogeneity(dat1)

write.csv(heterogeneity, file = "heterogeneity.csv", na = "NA")

directionality_test(dat1)

steiger<-directionality_test(dat1)

write.csv(steiger, file = "steiger.csv", na = "NA")

mr_pleiotropy_test(dat1)

pleiotropy<-mr_pleiotropy_test(dat1)

write.csv(pleiotropy, file = "pleiotropy.csv", na = "NA")

res_single <- mr_singlesnp(dat1)

res_single

write.csv(res_single, file = "res_single.csv", na = "NA")

res_loo <- mr_leaveoneout(dat1)

res_loo

write.csv(res_loo, file = "res_loo.csv", na = "NA")

p1 <- mr_scatter_plot(res, dat1)

p1[[1]]

library(ggplot2)

ggsave(p1[[1]], file="p1.pdf", width=7, height=7)

p2 <- mr_forest_plot(res_single)

p2[[1]]

ggsave(p2[[1]], file="p2.pdf", width=7, height=7)

p3 <- mr_leaveoneout_plot(res_loo)

p3[[1]]

ggsave(p3[[1]], file="p3.pdf", width=7, height=7)

res_single <- mr_singlesnp(dat1)

p4 <- mr_funnel_plot(res_single)

p4[[1]]

ggsave(p4[[1]], file="p4.pdf", width=7, height=7)

**LTL on ovarian cancer**

library(TwoSampleMR)

setwd("D:/R")

exp_dat <- read_exposure_data(

filename = "LTL.csv",

sep = ",",

snp_col = "SNP",

beta_col = "Beta_meta",

se_col = "SE_meta",

effect_allele_col = "Test allele",

other_allele_col = "Other allele",

pval_col = "P_meta",

samplesize_col = "N",)

exp_dat <- exp_dat[exp_dat$pval.exposure < 5e-8,]

exp_dat <- clump_data(

exp_dat,

clump_kb = 10000,

clump_r2 = 0.01,

clump_p1 = 1,

clump_p2 = 1,

pop = "EAS")

write.csv(exp_dat, file="exp_dat.csv")

out_dat <- read_outcome_data(

snps = exp_dat$SNP,

filename = "ovca.csv",

sep = ",",

snp_col = "SNP",

beta_col = "BETA",

se_col = "SE",

effect_allele_col = "Allele2",

other_allele_col = "Allele1",

eaf_col = "AF_Allele2",

pval_col = "p.value",

samplesize_col = "N")

write.csv(exp_dat, file="out_dat.csv")

dat <- harmonise_data(

exposure_dat = exp_dat,

outcome_dat = out_dat)

write.csv(dat, file="dat.csv")

run_mr_presso(dat,NbDistribution = 1000)

mrpresso<-run_mr_presso(dat,NbDistribution = 1000)

write.csv(mrpresso, file = "mr_presso.csv", na = "NA")

res <- mr(dat)

res

generate_odds_ratios(res)

res5or<-generate_odds_ratios(res)

write.csv(res5or, file = "res5or.csv", na = "NA")

mr_heterogeneity(dat)

heterogeneity<-mr_heterogeneity(dat)

write.csv(heterogeneity, file = "heterogeneity.csv", na = "NA")

directionality_test(dat)

steiger<-directionality_test(dat)

write.csv(steiger, file = "steiger.csv", na = "NA")

mr_pleiotropy_test(dat)

pleiotropy<-mr_pleiotropy_test(dat)

write.csv(pleiotropy, file = "pleiotropy.csv", na = "NA")

res_single <- mr_singlesnp(dat)

res_single

write.csv(res_single, file = "res_single.csv", na = "NA")

res_loo <- mr_leaveoneout(dat)

res_loo

write.csv(res_loo, file = "res_loo.csv", na = "NA")

p1 <- mr_scatter_plot(res, dat)

p1[[1]]

library(ggplot2)

ggsave(p1[[1]], file="p1.pdf", width=7, height=7)

p2 <- mr_forest_plot(res_single)

p2[[1]]

ggsave(p2[[1]], file="p2.pdf", width=7, height=7)

p3 <- mr_leaveoneout_plot(res_loo)

p3[[1]]

ggsave(p3[[1]], file="p3.pdf", width=7, height=7)

res_single <- mr_singlesnp(dat)

p4 <- mr_funnel_plot(res_single)

p4[[1]]

ggsave(p4[[1]], file="p4.pdf", width=7, height=7)

**LTL on pancreatic cancer**

library(TwoSampleMR)

setwd("D:/R")

exp_dat <- read_exposure_data(

filename = "LTL.csv",

sep = ",",

snp_col = "SNP",

beta_col = "Beta_meta",

se_col = "SE_meta",

effect_allele_col = "Test allele",

other_allele_col = "Other allele",

pval_col = "P_meta",

samplesize_col = "N",)

exp_dat <- exp_dat[exp_dat$pval.exposure < 5e-8,]

exp_dat <- clump_data(

exp_dat,

clump_kb = 10000,

clump_r2 = 0.01,

clump_p1 = 1,

clump_p2 = 1,

pop = "EAS")

write.csv(exp_dat, file="exp_dat.csv")

out_dat <- read_outcome_data(

snps = exp_dat$SNP,

filename = "paca.csv",

sep = ",",

snp_col = "SNP",

beta_col = "BETA",

se_col = "SE",

effect_allele_col = "Allele2",

other_allele_col = "Allele1",

eaf_col = "AF_Allele2",

pval_col = "p.value",

samplesize_col = "N")

write.csv(exp_dat, file="out_dat.csv")

dat <- harmonise_data(

exposure_dat = exp_dat,

outcome_dat = out_dat)

write.csv(dat, file="dat.csv")

run_mr_presso(dat,NbDistribution = 1000)

mrpresso<-run_mr_presso(dat,NbDistribution = 1000)

write.csv(mrpresso, file = "mr_presso.csv", na = "NA")

res <- mr(dat)

res

generate_odds_ratios(res)

res5or<-generate_odds_ratios(res)

write.csv(res5or, file = "res5or.csv", na = "NA")

mr_heterogeneity(dat)

heterogeneity<-mr_heterogeneity(dat)

write.csv(heterogeneity, file = "heterogeneity.csv", na = "NA")

directionality_test(dat)

steiger<-directionality_test(dat)

write.csv(steiger, file = "steiger.csv", na = "NA")

mr_pleiotropy_test(dat)

pleiotropy<-mr_pleiotropy_test(dat)

write.csv(pleiotropy, file = "pleiotropy.csv", na = "NA")

res_single <- mr_singlesnp(dat)

res_single

write.csv(res_single, file = "res_single.csv", na = "NA")

res_loo <- mr_leaveoneout(dat)

res_loo

write.csv(res_loo, file = "res_loo.csv", na = "NA")

p1 <- mr_scatter_plot(res, dat)

p1[[1]]

library(ggplot2)

ggsave(p1[[1]], file="p1.pdf", width=7, height=7)

p2 <- mr_forest_plot(res_single)

p2[[1]]

ggsave(p2[[1]], file="p2.pdf", width=7, height=7)

p3 <- mr_leaveoneout_plot(res_loo)

p3[[1]]

ggsave(p3[[1]], file="p3.pdf", width=7, height=7)

res_single <- mr_singlesnp(dat)

p4 <- mr_funnel_plot(res_single)

p4[[1]]

ggsave(p4[[1]], file="p4.pdf", width=7, height=7)

**LTL on prostate cancer**

library(TwoSampleMR)

setwd("D:/R")

exp_dat <- read_exposure_data(

filename = "LTL.csv",

sep = ",",

snp_col = "SNP",

beta_col = "Beta_meta",

se_col = "SE_meta",

effect_allele_col = "Test allele",

other_allele_col = "Other allele",

pval_col = "P_meta",

samplesize_col = "N",)

exp_dat <- exp_dat[exp_dat$pval.exposure < 5e-8,]

exp_dat <- clump_data(

exp_dat,

clump_kb = 10000,

clump_r2 = 0.01,

clump_p1 = 1,

clump_p2 = 1,

pop = "EAS")

write.csv(exp_dat, file="exp_dat.csv")

out_dat <- read_outcome_data(

snps = exp_dat$SNP,

filename = "prca.csv",

sep = ",",

snp_col = "SNP",

beta_col = "BETA",

se_col = "SE",

effect_allele_col = "Allele2",

other_allele_col = "Allele1",

eaf_col = "AF_Allele2",

pval_col = "p.value",

samplesize_col = "N")

write.csv(exp_dat, file="out_dat.csv")

dat <- harmonise_data(

exposure_dat = exp_dat,

outcome_dat = out_dat)

write.csv(dat, file="dat.csv")

run_mr_presso(dat,NbDistribution = 1000)

ex<-c(7,8)

dat1<-dat[-ex,]

write.csv(dat1, file="dat1.csv")

run_mr_presso(dat1,NbDistribution = 1000)

mrpresso<-run_mr_presso(dat1,NbDistribution = 1000)

write.csv(mrpresso, file = "mr_presso.csv", na = "NA")

res <- mr(dat1)

res

generate_odds_ratios(res)

res5or<-generate_odds_ratios(res)

write.csv(res5or, file = "res5or.csv", na = "NA")

mr_heterogeneity(dat1)

heterogeneity<-mr_heterogeneity(dat1)

write.csv(heterogeneity, file = "heterogeneity.csv", na = "NA")

directionality_test(dat)

steiger<-directionality_test(dat1)

write.csv(steiger, file = "steiger.csv", na = "NA")

mr_pleiotropy_test(dat1)

pleiotropy<-mr_pleiotropy_test(dat1)

write.csv(pleiotropy, file = "pleiotropy.csv", na = "NA")

res_single <- mr_singlesnp(dat1)

res_single

write.csv(res_single, file = "res_single.csv", na = "NA")

res_loo <- mr_leaveoneout(dat1)

res_loo

write.csv(res_loo, file = "res_loo.csv", na = "NA")

p1 <- mr_scatter_plot(res, dat1)

p1[[1]]

library(ggplot2)

ggsave(p1[[1]], file="p1.pdf", width=7, height=7)

p2 <- mr_forest_plot(res_single)

p2[[1]]

ggsave(p2[[1]], file="p2.pdf", width=7, height=7)

p3 <- mr_leaveoneout_plot(res_loo)

p3[[1]]

ggsave(p3[[1]], file="p3.pdf", width=7, height=7)

res_single <- mr_singlesnp(dat1)

p4 <- mr_funnel_plot(res_single)

p4[[1]]

ggsave(p4[[1]], file="p4.pdf", width=7, height=7)
